# Supplementary material
Source: PubMed Central journal article supplement (PMC3329385)
Supplement: supp_M021063_jlr.M021063-1.pdf [file supp_M021063_jlr.M021063-1.pdf]

**Supplemental Table 1.** siRNA sequences (A). The first column in the table indicates the passenger strand from 5' to 3' end and the second column is the guide strand from 3' to 5' end. Abbreviations for the modifications are as follows: d (deoxy), flu (2' fluoro), ome (2'-O-methyl), ribo (ribose), iB (inverted abasic nucleotide). siRNA screen (B).

**Supplemental Table 2.** Gene expression changes at day 14 for control PBS, control siRNA, ApoB and Mtp siRNA treatments. Genes within the triglyceride synthesis (SREBP1c) pathway are highlighted (brown).

Supplemental Table 1

| <b>A</b>             | <b>Passenger Strand</b>                                                                                       | <b>Guide Strand</b>                                                                                   |
|----------------------|---------------------------------------------------------------------------------------------------------------|-------------------------------------------------------------------------------------------------------|
| <b>control siRNA</b> | iB;fluU;fluC;fluU;fluU;fluU;fluU;dA;dA;fluC;fluU;fluC;fluU;fluC;fluU;fluU;fluC;dA;dG;dG;dT;dT;iBSup           | fluC;fluC;fluU;omeG;omeA;omeA;omeG;omeA;omeG;omeA;omeG;fluU;omeA;omeA;omeA;rA;rG;rA;omeU;omeUSup      |
| <b>Dgat2</b>         | aba;fluC;fluU;dG;fluU;dA;dA;dA;fluU;fluU;fluU;dG;dG;dA;dA;dG;fluC;dG;fluU;fluC;dT;dT;iBSup                    | rG;rA;rC;omeG;fluC;fluU;fluU;fluC;fluC;omeA;omeA;omeA;fluU;fluU;fluU;omeA;fluC;omeA;omeG;omeU;omeUSup |
| <b>Mtp</b>           | [[B]][dG][dA][fluU][dA][fluU][dG][fluC][fluU][dA][fluU][dG][dA][fluC][dG][fluU][dG][fluC][fluC][fluU]dTdT[iB] | rA;rG;rG;fluC;omeA;fluC;omeG;fluU;fluC;omeA;fluU;omeA;omeG;fluC;omeA;fluU;omeA;fluU;fluC;omeU;omeUSup |
| <b>ApoB</b>          | iB;fluU;fluC;dA;fluU;fluC;dA;fluC;dA;fluC;fluU;dG;dA;dA;fluU;dA;fluC;fluC;dA;dA;dT;dT;iBSup                   | rU;rU;rG;omeG;fluU;omeA;fluU;fluU;fluC;omeA;omeG;fluU;omeG;fluU;omeG;omeA;fluU;omeG;omeA;omeU;omeUSup |

| <b>B</b> | <b>siRNA</b> | <b>% Expression</b> | <b>EC50 (pM)</b> |
|----------|--------------|---------------------|------------------|
|          | Dgat2        | 25                  | 20               |
|          | Mtp          | 7                   | 2                |
|          | ApoB         | 6                   | 99               |

| Gene            | PBS          |         | Cntrl        |         | ApoB         |         | Mtp          |         |
|-----------------|--------------|---------|--------------|---------|--------------|---------|--------------|---------|
|                 | Ave Fold Reg | p-value |
| Aacs            | -2.08        | 0.447   | -0.08        | N/A     | -2.6         | 0.003   | -2.6         | 0.005   |
| Acaca           | -0.87        | 0.419   | -0.1         | N/A     | -2.08        | 0.003   | -2.79        | 0.004   |
| Acacb           | -1.94        | 0.66    | 0.11         | N/A     | -4.81        | 0.001   | -4.68        | 0.002   |
| Acat2           | -2.11        | 0.149   | 0.12         | N/A     | -2.14        | 0.015   | -2.49        | 0.005   |
| Acly            | -1.55        | 0.948   | -0.11        | N/A     | -1.75        | 0.063   | -2.66        | 0.015   |
| Acscf2          | -0.95        | 0.527   | 0.12         | N/A     | 0.5          | 0.793   | -1.35        | 0.111   |
| Acs1            | -3.36        | 0.082   | -0.02        | N/A     | -1.26        | 0.258   | -1.44        | 0.097   |
| Acs3            | -1.47        | 0.274   | -0.29        | N/A     | -1.85        | 0.055   | -2.67        | 0.017   |
| Acs4            | -1.36        | 0.344   | -0.28        | N/A     | -2.02        | 0.033   | -1.7         | 0.083   |
| Acs5            | -1.37        | 0.30    | -0.30        | N/A     | -2.24        | 0.01    | -2.57        | 0.00    |
| Acscs2          | -2.63        | 0.19    | 0.21         | N/A     | -3.49        | 0.00    | -4.53        | 0.00    |
| ActB            | 0.01         | 1.00    | 0.14         | N/A     | 1.00         | 1.00    | 1.00         | 1.00    |
| Adi1            | -2.97        | 0.06    | -0.55        | N/A     | -1.78        | 0.14    | -1.88        | 0.03    |
| Agpat1          | -0.75        | 0.54    | 0.27         | N/A     | -1.27        | 0.42    | -1.22        | 0.22    |
| Agpat2          | -1.26        | 0.36    | -0.35        | N/A     | -1.67        | 0.04    | -1.81        | 0.02    |
| Agpat3          | -1.39        | 0.24    | -0.31        | N/A     | -1.67        | 0.06    | -1.71        | 0.06    |
| Agpat4          | -0.34        | 0.93    | 0.06         | N/A     | 0.10         | 0.90    | -0.78        | 0.42    |
| Agpat5          | -0.23        | 0.81    | -0.07        | N/A     | -1.05        | 0.29    | -0.84        | 0.29    |
| Agpat6          | -0.68        | 0.55    | 0.06         | N/A     | -0.80        | 0.34    | -1.37        | 0.17    |
| Agpat9          | -1.75        | 0.22    | -0.35        | N/A     | -1.11        | 0.28    | -1.84        | 0.06    |
| Angptl4         | 0.37         | 0.81    | 0.11         | N/A     | -0.21        | 0.97    | 0.90         | 0.21    |
| ApoA1           | -1.96        | 0.08    | -0.39        | N/A     | -1.93        | 0.02    | -1.60        | 0.07    |
| ApoB            | -1.08        | 0.25    | -0.35        | N/A     | -8.27        | 0.00    | -1.23        | 0.13    |
| ApoC3           | -1.00        | 0.29    | -0.36        | N/A     | -1.00        | 0.38    | -1.06        | 0.29    |
| ApoE            | -1.11        | 0.17    | -0.36        | N/A     | -1.08        | 0.23    | -1.01        | 0.30    |
| Baat            | -0.53        | 0.56    | -0.14        | N/A     | -0.72        | 0.28    | -1.11        | 0.16    |
| Cds1            | -1.29        | 0.24    | -0.26        | N/A     | -1.86        | 0.07    | -2.14        | 0.04    |
| Chpt1           | -1.41        | 0.27    | -0.61        | N/A     | -1.45        | 0.14    | -1.81        | 0.03    |
| Cyb5r3          | -1.99        | 0.13    | -0.38        | N/A     | -1.91        | 0.01    | -1.99        | 0.00    |
| Cyp27a1         | -1.50        | 0.18    | -0.05        | N/A     | -1.77        | 0.06    | -1.57        | 0.11    |
| Cyp39a1         | -1.72        | 0.24    | -0.26        | N/A     | -3.00        | 0.00    | -2.77        | 0.02    |
| Cyp46a1         | -2.14        | 0.25    | 0.34         | N/A     | -1.27        | 0.14    | -2.30        | 0.01    |
| Cyp51a1         | -0.95        | 0.47    | 0.15         | N/A     | -2.31        | 0.00    | -2.13        | 0.00    |
| Cyp7a1          | -0.49        | 0.64    | -0.13        | N/A     | -0.57        | 0.53    | -2.23        | 0.10    |
| Cyp7b1          | 0.77         | 0.60    | 0.19         | N/A     | 1.19         | 0.42    | 1.80         | 0.26    |
| Cyp8b1          | -1.29        | 0.25    | 0.40         | N/A     | -2.47        | 0.00    | -3.05        | 0.03    |
| Dgat1           | -1.37        | 0.35    | -0.12        | N/A     | -1.57        | 0.04    | -1.81        | 0.01    |
| Dgat2           | -0.72        | 0.50    | 0.15         | N/A     | -0.18        | 0.84    | -1.45        | 0.06    |
| Dhcr24          | -0.16        | 0.85    | 0.14         | N/A     | -1.90        | 0.00    | -2.27        | 0.01    |
| Dhcr7           | -1.05        | 0.34    | 0.14         | N/A     | -1.80        | 0.00    | -2.24        | 0.00    |
| Elovl1          | -0.01        | 0.95    | -0.14        | N/A     | -0.80        | 0.08    | -0.61        | 0.27    |
| Elovl2          | -0.72        | 0.59    | -0.42        | N/A     | -3.55        | 0.00    | -2.99        | 0.00    |
| Elovl3          | -1.94        | 0.09    | -0.29        | N/A     | -3.80        | 0.00    | -1.19        | 0.53    |
| Elovl4          | 3.37         | 0.07    | -0.23        | N/A     | 1.79         | 0.23    | 1.93         | 0.16    |
| Elovl5          | -1.97        | 0.23    | -0.13        | N/A     | -5.22        | 0.00    | -5.67        | 0.00    |
| Elovl6          | -2.13        | 0.53    | -0.14        | N/A     | -3.19        | 0.00    | -4.00        | 0.00    |
| Fads1           | -1.48        | 0.47    | 0.14         | N/A     | -3.49        | 0.00    | -3.37        | 0.00    |
| Fads2           | -1.63        | 0.40    | 0.38         | N/A     | -3.72        | 0.00    | -3.66        | 0.00    |
| Fads3           | -0.05        | 0.95    | 0.14         | N/A     | -0.50        | 0.73    | -0.47        | 0.76    |
| Fasn            | -1.54        | 0.39    | 0.08         | N/A     | -2.45        | 0.00    | -7.43        | 0.00    |
| Fdft1           | 2.23         | 0.20    | -0.36        | N/A     | -0.62        | 0.55    | -0.54        | 0.68    |
| Fdps            | -0.01        | 0.81    | -0.15        | N/A     | -2.87        | 0.00    | -3.33        | 0.01    |
| Gpat            | -0.91        | 0.65    | 0.03         | N/A     | -1.09        | 0.35    | -3.89        | 0.04    |
| Gpr65           | -0.21        | 0.64    | 0.14         | N/A     | -0.52        | 0.60    | -0.53        | 0.65    |
| Haa0            | -0.16        | 0.85    | -0.12        | N/A     | -0.90        | 0.27    | -1.03        | 0.09    |
| Hmgcr           | -0.93        | 0.64    | -0.43        | N/A     | -1.47        | 0.00    | -2.17        | 0.00    |
| Hmgcs1          | -1.05        | 0.25    | 0.15         | N/A     | -2.06        | 0.00    | -2.25        | 0.01    |
| Hsd17b6         | -1.15        | 0.51    | 0.19         | N/A     | -0.11        | 0.98    | -2.22        | 0.15    |
| Hsd3b7          | 0.55         | 0.72    | -0.28        | N/A     | -0.51        | 0.78    | -0.59        | 0.63    |
| Idi1            | -1.30        | 0.22    | -0.14        | N/A     | -2.52        | 0.00    | -2.72        | 0.01    |
| Lcat            | 0.00         | 0.94    | -0.13        | N/A     | -1.19        | 0.28    | -0.87        | 0.43    |
| Ldlr            | -0.81        | 0.46    | -0.14        | N/A     | -1.42        | 0.02    | -2.02        | 0.00    |
| Lpcat4 (Agpat7) | -0.04        | 0.88    | 0.14         | N/A     | -0.22        | 0.72    | -0.31        | 0.45    |
| Lrp8            | 0.67         | 0.47    | 0.37         | N/A     | 0.24         | 0.82    | 0.83         | 0.38    |
| Lycat (Agpat8)  | -1.03        | 0.27    | -0.13        | N/A     | -0.58        | 0.32    | -0.89        | 0.05    |

|         |              |             |              |     |              |             |              |             |
|---------|--------------|-------------|--------------|-----|--------------|-------------|--------------|-------------|
| Mogat1  | <b>-0.92</b> | <b>0.48</b> | <b>0.11</b>  | N/A | <b>0.51</b>  | <b>0.71</b> | <b>-3.03</b> | <b>0.08</b> |
| Mogat2  | <b>-0.57</b> | <b>0.60</b> | <b>-0.15</b> | N/A | <b>1.19</b>  | <b>0.30</b> | <b>-2.17</b> | <b>0.08</b> |
| Mtp     | -0.64        | 0.63        | -0.15        | N/A | -1.59        | 0.00        | -6.86        | 0.00        |
| Mvd     | -0.06        | 0.93        | 0.13         | N/A | -1.81        | 0.09        | -2.58        | 0.30        |
| Mvk     | 0.68         | 0.58        | 0.14         | N/A | 0.51         | 0.39        | -0.21        | 0.71        |
| Pcsk9   | -0.08        | 1.00        | 0.13         | N/A | -1.59        | 0.01        | -2.46        | 0.01        |
| Pcyt2   | -0.80        | 0.37        | 0.14         | N/A | -1.63        | 0.00        | -1.69        | 0.00        |
| Pmvk    | -1.63        | 0.15        | 0.38         | N/A | -3.21        | 0.00        | -3.27        | 0.01        |
| Ppap2a  | -74.81       | 0.00        | -0.13        | N/A | -50.58       | 0.27        | -26.10       | 0.61        |
| Ppap2b  | 0.33         | 0.78        | 0.14         | N/A | -0.93        | 0.21        | -1.70        | 0.00        |
| Ppap2c  | -0.17        | 0.87        | -0.13        | N/A | -0.88        | 0.39        | -0.34        | 0.39        |
| Ppara   | -0.65        | 0.64        | 0.14         | N/A | -0.73        | 0.21        | -1.33        | 0.04        |
| Ppard   | -0.54        | 0.56        | -0.36        | N/A | -2.16        | 0.02        | -0.52        | 0.81        |
| Pparg   | -0.37        | 0.93        | -0.13        | N/A | -2.00        | 0.00        | -1.21        | 0.04        |
| Ppia    | -0.29        | 0.85        | -0.14        | N/A | -0.92        | 0.28        | -0.59        | 0.41        |
| Scap    | 0.09         | 0.90        | -0.12        | N/A | -1.04        | 0.06        | -0.66        | 0.19        |
| Scarb1  | 0.27         | 0.87        | -0.11        | N/A | -0.87        | 0.49        | -0.46        | 0.87        |
| Scd1    | <b>-1.47</b> | <b>0.18</b> | <b>0.14</b>  | N/A | <b>-4.92</b> | <b>0.00</b> | <b>-5.56</b> | <b>0.00</b> |
| Scd2    | <b>0.21</b>  | <b>0.79</b> | <b>0.14</b>  | N/A | <b>0.48</b>  | <b>0.67</b> | <b>-0.03</b> | <b>0.78</b> |
| Sgpl1   | 0.49         | 0.79        | -0.14        | N/A | -1.09        | 0.09        | -1.18        | 0.05        |
| Sgpp1   | 0.06         | 0.98        | 0.42         | N/A | -0.98        | 0.13        | -1.07        | 0.08        |
| Slc27a5 | -0.36        | 0.83        | 0.17         | N/A | -0.57        | 0.57        | -0.96        | 0.34        |
| Soat1   | 0.22         | 0.77        | -0.15        | N/A | -0.51        | 0.53        | -0.15        | 0.93        |
| Soat2   | -0.39        | 0.60        | 0.15         | N/A | -0.55        | 0.39        | -1.76        | 0.00        |
| Sptlc1  | 0.06         | 0.95        | -0.14        | N/A | -1.35        | 0.04        | -1.42        | 0.01        |
| Srebf2  | -0.24        | 0.61        | 0.42         | N/A | -0.71        | 0.07        | -1.13        | 0.02        |
| Stard3  | 0.29         | 0.75        | 0.14         | N/A | -0.83        | 0.41        | -0.26        | 0.52        |
| Tm7sf2  | -0.95        | 0.47        | 0.14         | N/A | -2.55        | 0.00        | -3.10        | 0.00        |
| Vldlr   | -23.98       | 0.43        | -0.18        | N/A | -0.96        | 0.81        | -1.97        | 0.20        |
| Xpnpep3 | 0.08         | 0.98        | 0.14         | N/A | 0.74         | 0.82        | -0.22        | 0.68        |
